# Supplementary material for: Sox4 Regulates the Sensitivity of Canine Mammary Gland Tumor Cells to Cisplatin via the Wnt/β-catenin Signaling Pathway
Source: Research Square preprint supplement (doi:10.21203/rs.3.rs-847008/v1), 2021-09-02
Supplement: Supplementary file 2 [file f6ad1285615274735841c01c.xlsx]

## Sheet: Sheet1
Supplementary Table 1
Genes	Forward Primer (5’-3’)	Reverse Primer(5’-3’)
Sox4	CGCTCGTGAACTGGAACCAA	CGAGTCTGGAGACCGTGCTAA
GAPDH	AAAGGGTCGGTGAGGCGATGA	TCTTCTGGGTGGCAGTGAT
